# Supplementary material for: Decreased photosynthesis in the erect panicle 3 (ep3) mutant of rice is associated with reduced stomatal conductance and attenuated guard cell development
Source: PubMed Central journal article supplement (PMC4339609; doi:10.1093/jxb/eru525), 2015-01-11
Supplement: supp_eru525_jexbot135053_file001.pdf [file supp_eru525_jexbot135053_file001.pdf]

Decreased photosynthesis in the *erect panicle 3 (ep3)* mutant of rice is associated with reduced stomatal conductance and attenuated guard cell development

Hongyang Yu, Erik H Murchie, Zinnia H Gonzalez-Carranza, Kevin A Pyke, Jeremy A Roberts\*

| Primer name | Sequences 5' to 3'            | Intended purpose                                                  |
|-------------|-------------------------------|-------------------------------------------------------------------|
| FCAPsEP3    | TCGTGTGCAACCCAATAACTAAGGTCT   | Primers used to test ep3 NMU mutant                               |
| RCAPsEP3    | TAGTTCAGTGAAGGGAGACACCCATGTA  |                                                                   |
| F2EP3       | CATGGGTGTCTCCCTTCACT          | Primers used to test the ep3 T-DNA insertion line 1C-03432.       |
| R2EP3       | GGTGAATGGCATCGTTTGAA          |                                                                   |
| FLB         | CTAGGAAGCAATGTCCAGCC          |                                                                   |
| ForEP3      | ATGGGGTCAGAGGAGTGGGAG         | Primers used to construct pBI101.2:HWSpro:EP3 and sequencing      |
| RevEP3      | CTAGGAAGCAATGTCCAGCC          |                                                                   |
| ForEP3BamHI | CGGGATCCATGGGGTCAGAGGAGTGGGAG |                                                                   |
| RevEP3SmaI  | TCCCCGGGCTAGGAAGCAATGTCCAGCC  |                                                                   |
| ForHWS5UTR  | AACCCGCATTCCTCTCGC            |                                                                   |
| RevGUS90    | GCTTTCCCACCAACGCTG            |                                                                   |
| SSLPHSfor   | GAGAGAGGCTTGTGATTGTCGGAG      | <i>HWS</i> specific primers used to identify <i>hws-1</i> from WT |
| SSLPHSrev   | GTGCCACTACTCGCGAAAACCTCG      |                                                                   |

Figure S1. The list of primers.

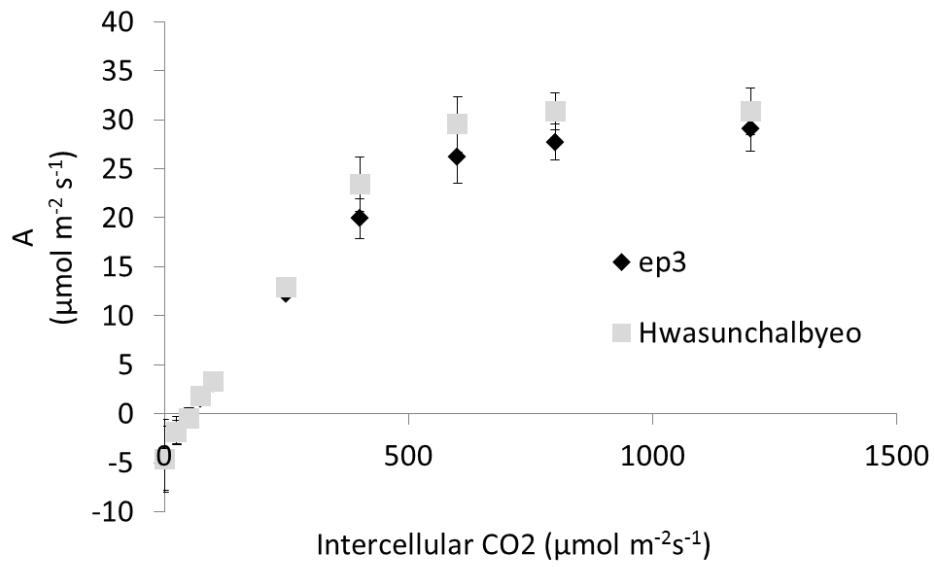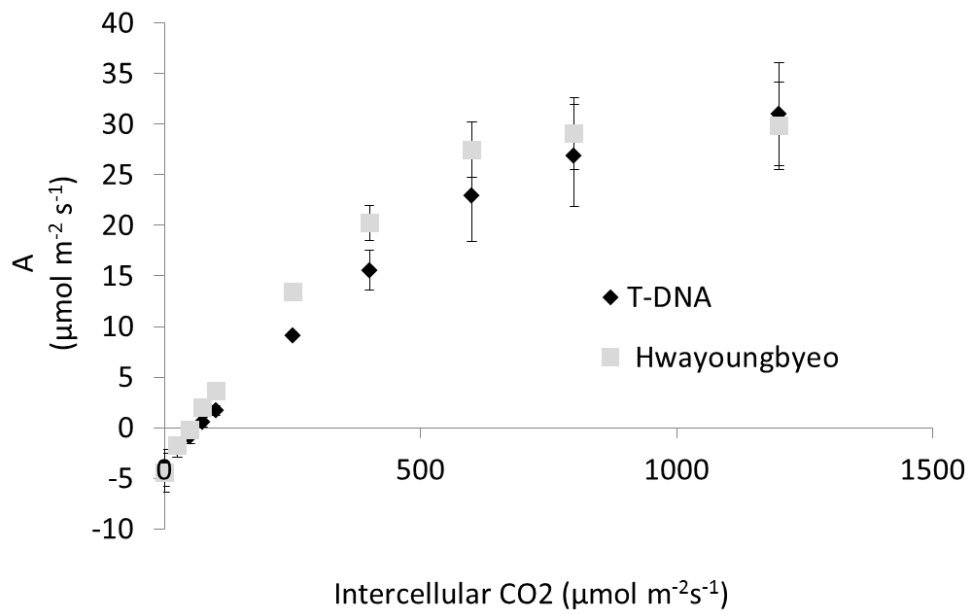

Figure S2. A/C<sub>i</sub> curves generated from gas-exchange and the comparison between *ep3* NMU mutant and Hwasunchalbyeo; between the T-DNA insertion line and Hwayoungbyeo.

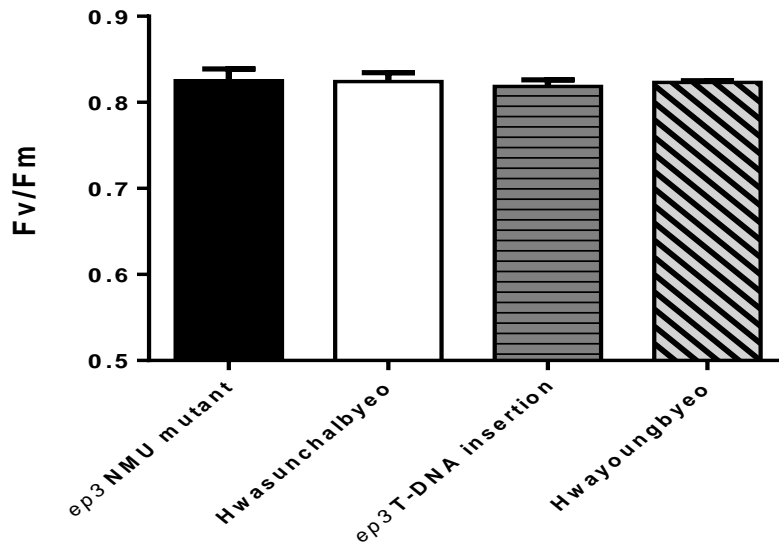

Figure S3. Analysis of dark adapted Fv/Fm from *ep3* NMU mutant, Hwasunchalbyeo, *ep3* T-DNA insertion 1C-03432.L and Hwayoungbyeo.

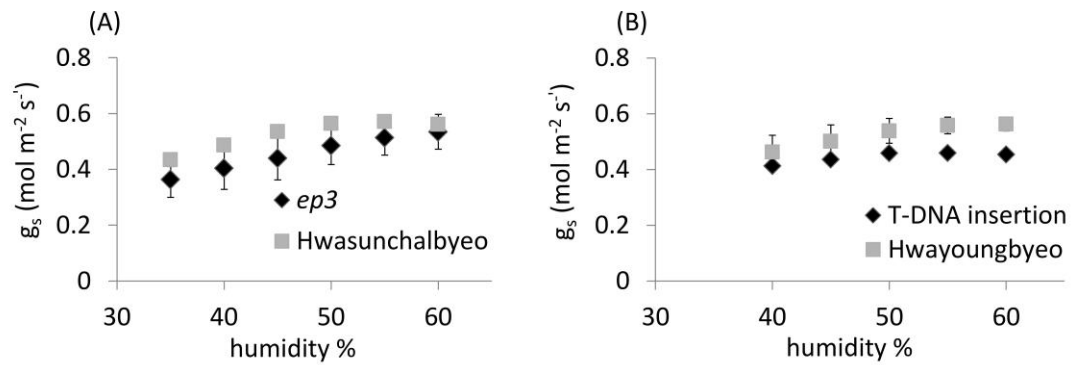

Figure S4. Analysis of stomatal conductance ( $g_s$ ) in response to an alteration in cuvette humidity. A significant decrease in  $g_s$  was observed in both *ep3* NMU mutant plants (A) ( $P \leq 0.001$ , paired t-test) and T-DNA insertion plants (B) ( $P < 0.01$ , paired t-test) when compared with Hwasunchalbyeo and Hwayoungbyeo respectively. Error bars in this figure show the SD,  $n=5$ .

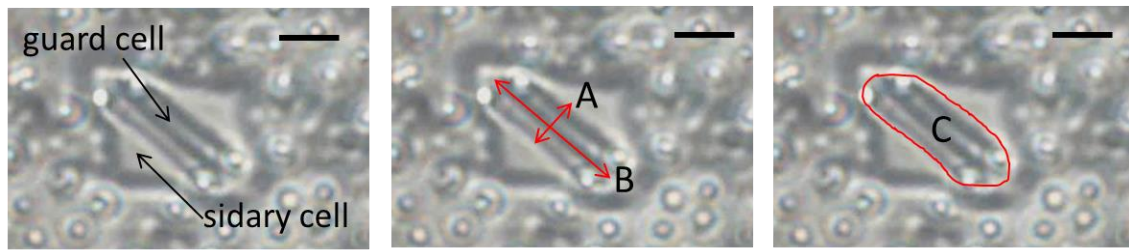

Figure S5. Rice leaf surface impression showing the measurements of stomatal length (A), width (B) and area (C). Scale bar = 10  $\mu\text{m}$ .

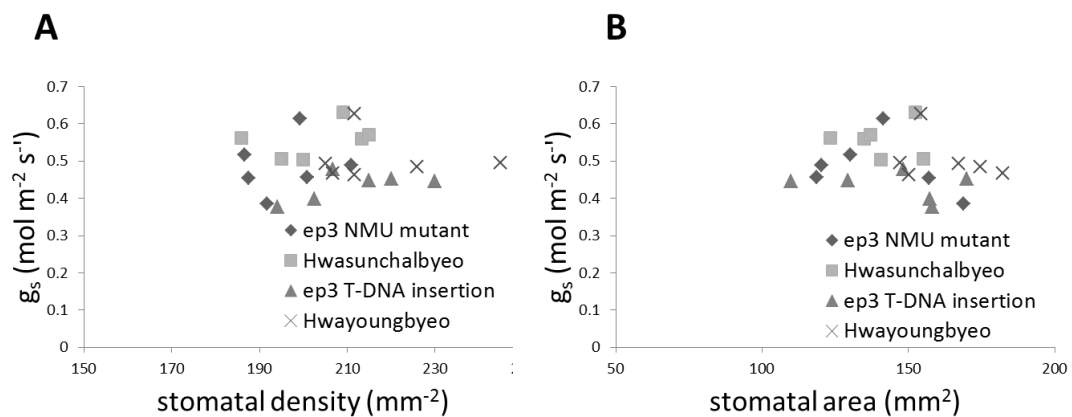

Figure S6. (A) Correlation between stomatal density and stomatal conductance at PAR  $1000 \mu\text{mol m}^{-2} \text{s}^{-1}$  (10% blue), relative humidity 50%. Each point represents one biological replicate for  $g_s$  and mean of 6 replicates for stomatal density. Stomatal density was calculated from both side of widest part of leaf-6 surface. Regression analysis didn't show significant correlation at 95% level using equation  $y=0.0003x+0.4432$ ,  $R^2=0.0026$ . (B) Correlation between stomatal area and stomatal conductance at PAR  $1000 \mu\text{mol m}^{-2} \text{s}^{-1}$  (10% blue), relative humidity 50%. Each point represents one biological replicate for  $g_s$  and mean of 12 individuals for stomatal area. Stomatal area was calculated from both side of widest part of leaf-6 surface. Regression analysis didn't show significant correlation at 95% level using equation  $y=-0.0007x+0.6029$ ,  $R^2=0.0396$ .

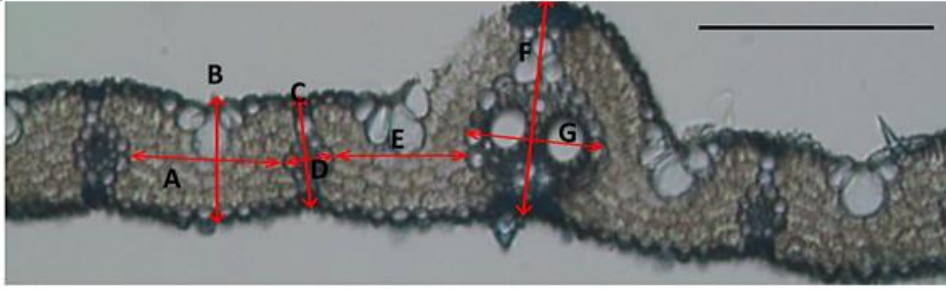

Figure S7. Rice leaf section showing the measurements of anatomical structure (A)The interveinal distance between minor veins; (B) leaf thickness at bulliform cells; (C) leaf thickness at minor vein; (D) width of minor vein; (E) interveinal distance between major vein and minor vein; (F) leaf thickness at major vein; (G) width of major vein. Scale bar = 200  $\mu\text{m}$ .

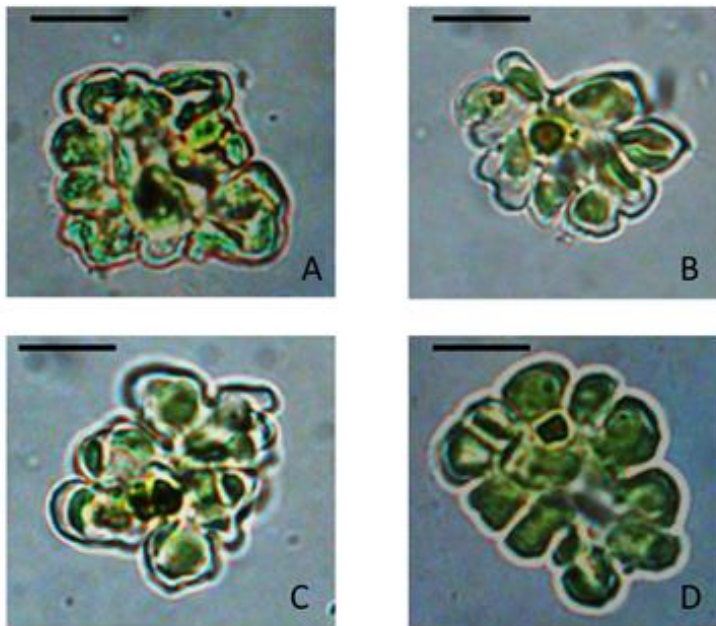

Figure S8. Single mesophyll cells preparation from (A) *ep3* NMU mutant; (B) Hwasunchalbyeo; (C) *ep3* T-DNA insertion 1C-03432.L; (D) Hwayoungbyeo. The scale bars indicate 10  $\mu\text{m}$ .

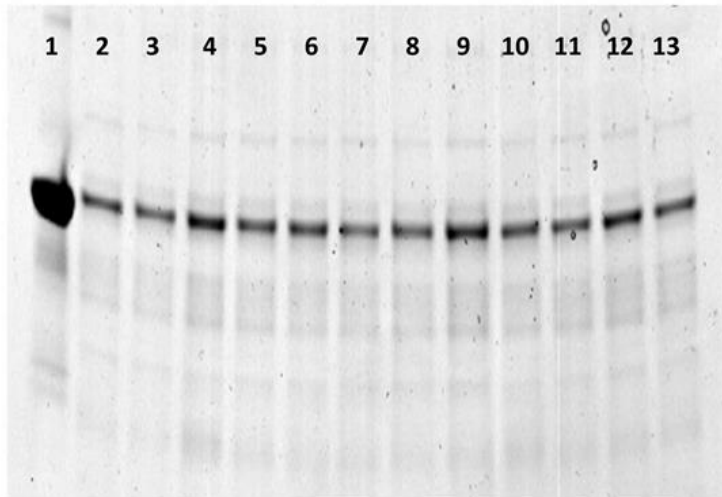

Figure S9. SDS-PAGE gel running of Rubisco larger subunit and standard sample. Lane 1, the standard Rubisco; lane 2-4, the three replicates of ep3 NMU mutant; 5-7, the three replicates of Hwasunchalbyeo; 8-10, the three replicates of ep3 T-DNA insertion 1C-03432.L; 11-13, Hwayoungbyeo.

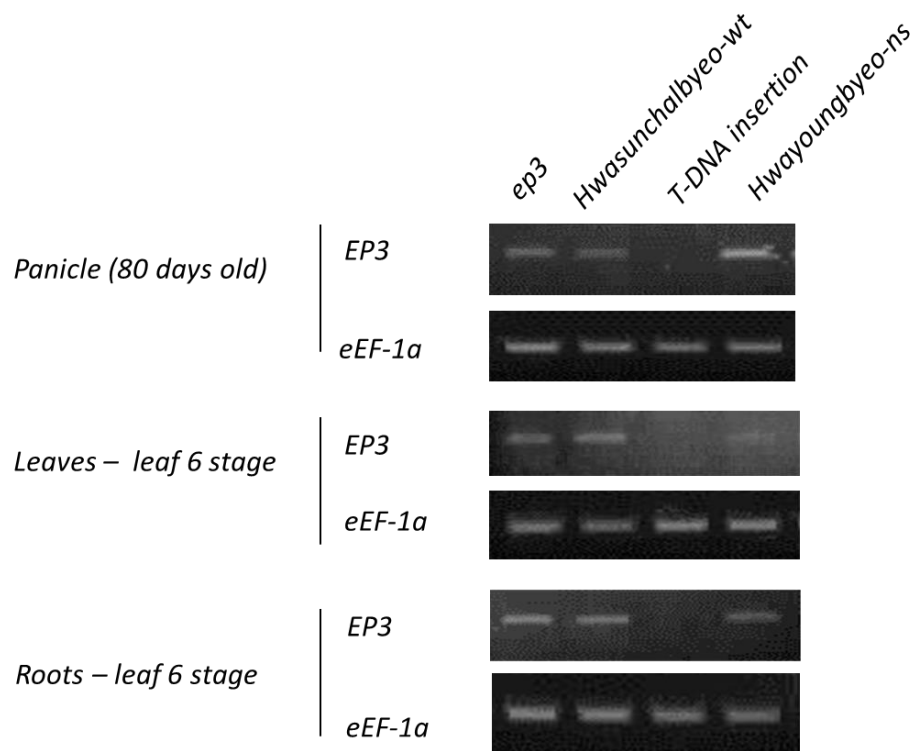

Figure S10. Gene expression analysis of *EP3* in different rice tissues. cDNA templates were generated by reverse-transcription of RNA extracted from rice tissues, including panicles from 80 days old plants, leaves from leaf-6-stage plants and root tissues from leaf-6-stage plants. Rice *eEF-1α* was used as the control gene. In the T-DNA insertion line, no transcripts of *EP3* were observed as the primer was designed to cross the T-DNA insertion.
